# Supplementary material
Source: Elsevier journal article supplement (https://www.sciencedirect.com/science/article/pii/S1885585725000222)
Supplement: mmc1 [file mmc1.pdf]

**Table 1 of the supplementary data.** Recommendations for CVD primary prevention in children and teenagers (girls and boys)

|                                 | Recommendations                                                                                                                                                                                                                                                                                                                                                                                                    |
|---------------------------------|--------------------------------------------------------------------------------------------------------------------------------------------------------------------------------------------------------------------------------------------------------------------------------------------------------------------------------------------------------------------------------------------------------------------|
| <i>CV risk factors check-up</i> | <p>Body mass index: measure annually from age 2 y</p> <p>Blood pressure: measure annually from age 3 y</p> <p>Fasting lipid profile and glycemia:</p> <ul style="list-style-type: none"> <li>- Age 9-11 y for the general population</li> <li>- Age &lt; 5 y if high risk conditions or family history of dyslipidemia or early CVD in men aged <math>\leq 55</math> y and women <math>\leq 65</math> y</li> </ul> |
| <i>Physical activity (PA)</i>   | <p>Moderate-vigorous PA for 60 min/d</p> <p>Vigorous PA 3 times/wk</p> <p><math>\leq 2</math> h/d of screen time</p>                                                                                                                                                                                                                                                                                               |
| <i>Smoking</i>                  | <p>Tobacco product taxation</p> <p>Creating smoke-free environments</p> <p>Electronic cigarettes and novel tobacco products require updated and proper regulation</p> <p>Public health campaigns with a focus on preventing smoking among young people should be gender-sensitive</p>                                                                                                                              |
| <i>Alcohol consumption</i>      | <p>Programs to inform young people of the harmful effects of alcohol in school and university</p> <p>Early detection</p> <p>Referral to addiction recovery programs in young people</p>                                                                                                                                                                                                                            |

Compiled using data from de Ferranti et al.<sup>1</sup>

**Table 2 of the supplementary data.** Postpartum follow-up

| Category                            | Postpartum actions                                                                                                                                                                             | Follow-up timeline                                                                                                    | Treatment considerations                                                                                                                                      |
|-------------------------------------|------------------------------------------------------------------------------------------------------------------------------------------------------------------------------------------------|-----------------------------------------------------------------------------------------------------------------------|---------------------------------------------------------------------------------------------------------------------------------------------------------------|
| Gestational diabetes                | Promote postpartum weight loss (5%-7%), control cardiovascular risk factors, promote breastfeeding, healthy habits, and healthy lifestyle                                                      | OGTT (75 g) between 4-12 wk postpartum; repeat screening annually or every 1-3 years if normal                        | Consider metformin for diabetes prevention; liraglutide (3 mg) may reduce risk of type 2 diabetes for those with overweight/obesity                           |
| Hypertensive disorders in pregnancy | Promote blood pressure monitoring (ABPM preferred, HBPM if not available) during the first 24 h, daily monitoring in the first week. If BP < 130/80 mmHg for 24 h, consider stopping treatment | Evaluate blood pressure control every 7-10 d initially, and long-term follow-up every 1-3 y as needed                 | Continue cardiovascular management based on risk level; adjust treatment as per control goals                                                                 |
| Obesity in pregnancy                | Encourage physical exercise, plan contraception until adequate weight is regained, monitor cardiovascular risk factors                                                                         | Refer to endocrinology if BMI $\geq$ 40, monitor and aim for cardiovascular risk goals recommended for the risk group | For women developing type 2 diabetes postpartum, prioritize metformin and medications lowering cardiovascular risk, such as GLP-1 receptor agonists or SGLT2i |

ABPM, ambulatory blood pressure monitoring; BMI, body mass index; BP, blood pressure; GLP-1, glucagon-like peptide-1; HBPM, home blood pressure monitoring; OGTT, oral glucose tolerance test; SGLT2i, sodium-glucose cotransporter 2 inhibitors.

Compiled using data from Lewey et al.<sup>2</sup>

**Table 3 of the supplementary data.** Recommendations on exercise in the climacteric

|                                                                                           |                                                                                                                                                 |
|-------------------------------------------------------------------------------------------|-------------------------------------------------------------------------------------------------------------------------------------------------|
| Recommendations on exercise in the climacteric. Resistance training is highly recommended | ≥ 2 d/wk                                                                                                                                        |
| Flexibility exercises (tai chi, yoga)                                                     | Allow the performance of aerobic exercise and prevent falls                                                                                     |
| Kegel exercises are useful to improve the tone of the pelvic floor muscles                | Reduce vaginal or pelvic pain during sexual intercourse, improve some forms of urinary incontinence, and prevent or treat pelvic organ prolapse |
| Nurse check-ups                                                                           | Recommended at least once a year                                                                                                                |

Compiled using data from Nguyen et al.<sup>3</sup>

## REFERENCES

1. de Ferranti SD, Steinberger J, Ameduri R, et al. Cardiovascular Risk Reduction in High-Risk Pediatric Patients: A Scientific Statement from the American Heart Association. *Circulation*. 2019;139:e603-e634.
2. Lewey J, Beckie TM, Brown HL, Brown SD. Opportunities in the Postpartum Period to Reduce Cardiovascular Disease Risk After Adverse Pregnancy Outcomes: A Scientific Statement From the American Heart Association. *Circulation*. 2024;149 ):e330-e346
3. Nguyen TM, Do TTT, Tran TN, Kim JH. Exercise and Quality of Life in Women with Menopausal Symptoms: A Systematic Review and Meta-Analysis of Randomized Controlled Trials. *Int J Environ Res Public Health*. 2020;17:7049.
